# Supplementary material for: A Comprehensive Drosophila melanogaster Transcription Factor Interactome
Source: PubMed Central journal article supplement — Cell Rep. Author manuscript; Available in PMC 2019 Apr 26. (PMC6485956; doi:10.1016/j.celrep.2019.03.071), 2019-04-16
Supplement: NIHMS1527199-supplement-1.pdf [file NIHMS1527199-supplement-1.pdf]

Cell Reports, Volume 27

## Supplemental Information

### **A Comprehensive *Drosophila melanogaster***

#### **Transcription Factor Interactome**

**Leila Shokri, Sachi Inukai, Antonina Hafner, Kathryn Weinand, Korneel Hens, Anastasia Vedenko, Stephen S. Gisselbrecht, Riccardo Dainese, Johannes Bischof, Edy Furger, Jean-Daniel Feuz, Konrad Basler, Bart Deplancke, and Martha L. Bulyk**

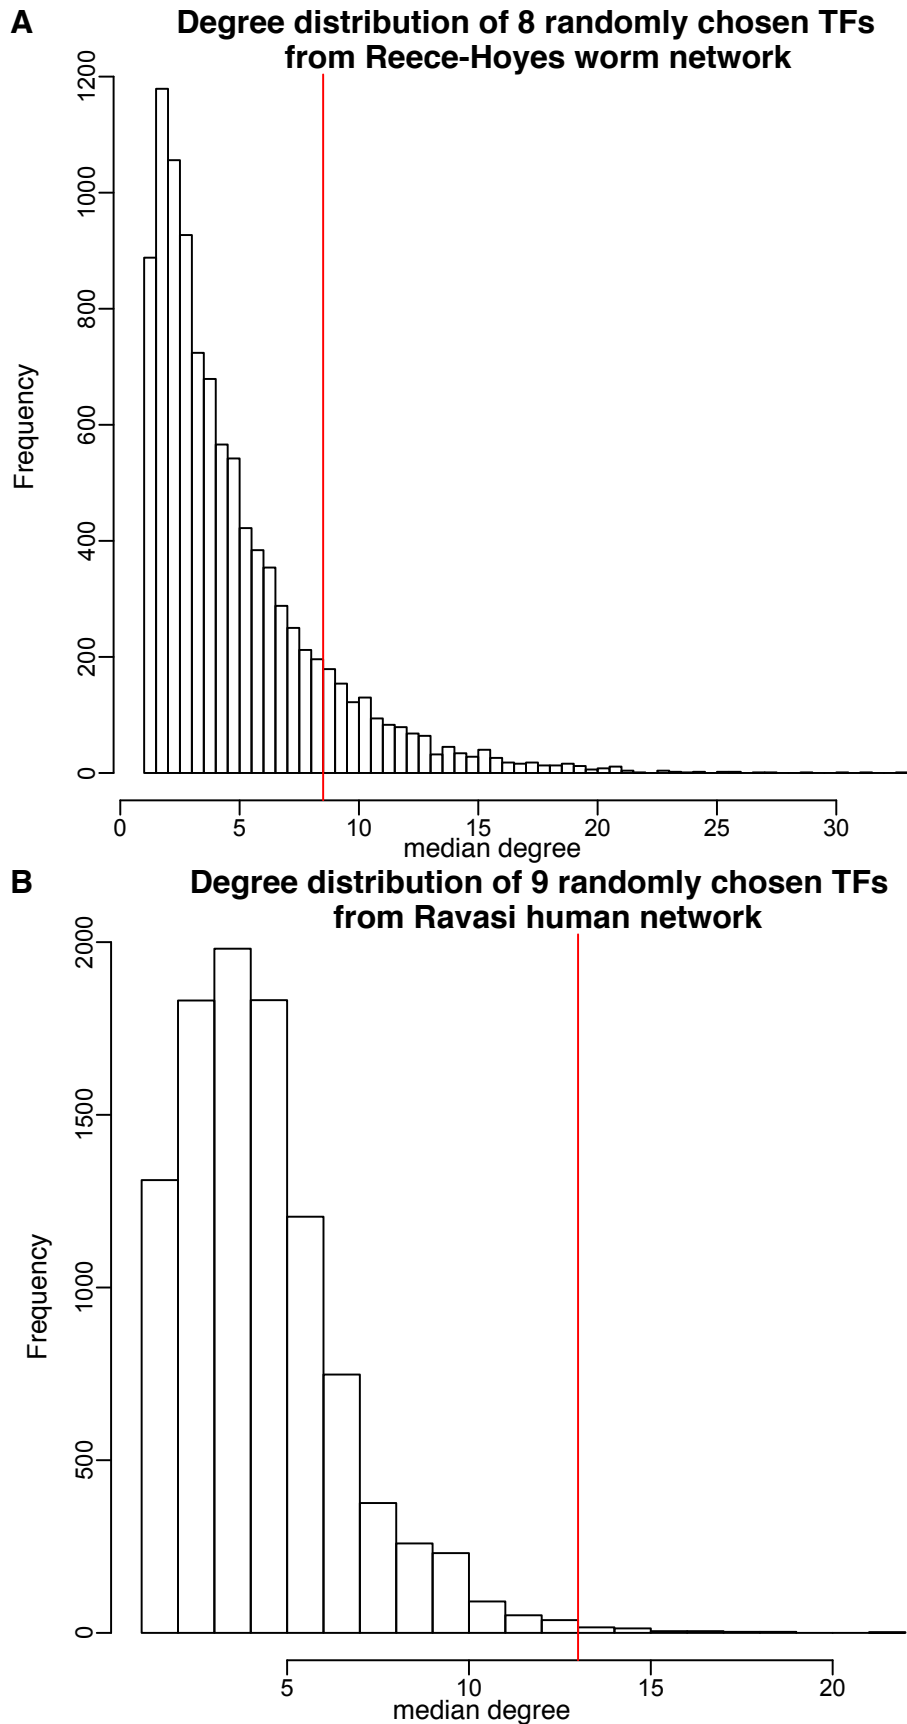

**Figure S1. Degree distributions of hub TFs' orthologs in (A) *C. elegans* (Reece-Hoyes et al., 2013) and (B) human (Ravasi et al., 2010) TF–TF interaction networks, related to Figure 1.** There were 8 worm orthologs and 9 human orthologs of fly hub TFs, corresponding to the numbers of TFs that were randomly sampled as a set in each panel. Red vertical lines indicate the median degree for hub orthologs.

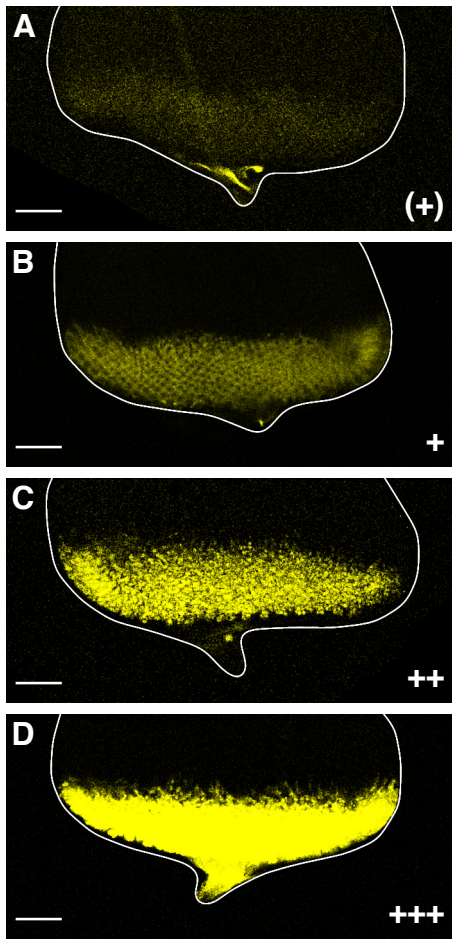

**Figure S2. Example images of BiFC corresponding to different interaction signal intensity calls in Table S4. Related to Figure 2. Scale bars are 50  $\mu\text{m}$ .**

Table S3: *Drosophila* TF–TF PRS pairs, Related to Figure 2.

| Gene 1 FBgn ID | Gene 1 Gene Symbol | Gene 2 FBgn ID | Gene 2 Gene Symbol | # PubmedIDs supporting interaction | Pubmed ID (MasterNet)                                                                                 | PPI found in Y2H | Tested in Y2H |
|----------------|--------------------|----------------|--------------------|------------------------------------|-------------------------------------------------------------------------------------------------------|------------------|---------------|
| FBgn0001168    | h                  | FBgn0001139    | gro                | 9                                  | 8001118<br>12154126<br>9371806<br>10213677<br>15935776<br>21343912<br>17898168<br>19805071<br>9892668 | No               | Yes           |
| FBgn0000611    | exd                | FBgn0001235    | hth                | 6                                  | 10215621<br>12408801<br>9346235<br>10704852<br>17981120<br>14605208                                   | Yes              | Yes           |
| FBgn0001077    | ftz                | FBgn0001078    | ftz-f1             | 5                                  | 15823536<br>11157757<br>16051145<br>11592991<br>14605208                                              | No               | Yes           |
| FBgn0004837    | Su(H)              | FBgn0001169    | H                  | 5                                  | 20231316<br>15710747<br>14605208<br>22036573<br>10079358                                              | No               | Yes           |
| FBgn0001168    | h                  | FBgn0020496    | CtBP               | 4                                  | 9524128<br>21343912<br>9892668<br>10973955                                                            | No               | Yes           |
| FBgn0001320    | kni                | FBgn0020496    | CtBP               | 4                                  | 17972097<br>19805071<br>14605208<br>22036573                                                          | No               | Yes           |
| FBgn0000588    | esc                | FBgn0015805    | Rpd3               | 4                                  | 11124122<br>12697833<br>12533794<br>15896722                                                          | No               | Yes           |
| FBgn0020496    | CtBP               | FBgn0003448    | sna                | 4                                  | 17972097<br>18309295<br>14605208<br>22036573                                                          | No               | Yes           |

|             |                      |             |                  |   |                                              |     |     |
|-------------|----------------------|-------------|------------------|---|----------------------------------------------|-----|-----|
| FBgn0000575 | emc                  | FBgn0004170 | sc               | 3 | 9371806<br>14605208<br>1525829               | Yes | Yes |
| FBgn0000022 | ac                   | FBgn0002609 | E(spl)m3-<br>HLH | 2 | 9371806<br>14605208                          | No  | Yes |
| FBgn0039044 | p53                  | FBgn0035357 | CG1244           | 2 | 15575970<br>15710747                         | No  | Yes |
| FBgn0000575 | emc                  | FBgn0267821 | da               | 2 | 9371806<br>14605208                          | No  | Yes |
| FBgn0000591 | E(spl)m8-<br>HLH     | FBgn0001139 | gro              | 2 | 9371806<br>14605208                          | No  | Yes |
| FBgn0002734 | E(spl)mdelta-<br>HLH | FBgn0001139 | gro              | 2 | 9371806<br>14605208                          | Yes | Yes |
| FBgn0002631 | E(spl)m5-<br>HLH     | FBgn0001139 | gro              | 2 | 9371806<br>14605208                          | No  | Yes |
| FBgn0002633 | E(spl)m7-<br>HLH     | FBgn0001139 | gro              | 2 | 9371806<br>9751710                           | No  | Yes |
| FBgn0002609 | E(spl)m3-<br>HLH     | FBgn0001139 | gro              | 2 | 9371806<br>14605208                          | No  | Yes |
| FBgn0001291 | Jra                  | FBgn0001291 | Jra              | 3 | 11554782<br>14605208<br>20813260             | No  | Yes |
| FBgn0017578 | Max                  | FBgn0023215 | Mnt              | 2 | 14605208<br>22036573                         | No  | Yes |
| FBgn0262656 | dm                   | FBgn0017578 | Max              | 2 | 17898168<br>14605208                         | No  | Yes |
| FBgn0043002 | Chrac-14             | FBgn0043001 | Chrac-16         | 3 | 10856248<br>14605208<br>22036573<br>22036573 | Yes | Yes |
| FBgn0024250 | brk                  | FBgn0020496 | CtBP             | 2 | 14605208<br>22036573                         | Yes | Yes |
| FBgn0001325 | Kr                   | FBgn0020496 | CtBP             | 2 | 19049982<br>14605208                         | No  | Yes |
| FBgn0032202 | CG18619              | FBgn0039209 | CG13624          | 2 | 14605208<br>22036573                         | No  | Yes |
| FBgn0033998 | row                  | FBgn0015602 | BEAF-32          | 2 | 14605208<br>22036573                         | No  | Yes |
| FBgn0001291 | Jra                  | FBgn0001297 | kay              | 2 | 14605208<br>22036573<br>22036573             | Yes | Yes |
| FBgn0004837 | Su(H)                | FBgn0031759 | lid              | 2 | 19782028<br>20231316                         | No  | Yes |
| FBgn0266452 | CG6854               | FBgn0020496 | CtBP             | 2 | 14605208<br>22036573                         | No  | Yes |
| FBgn0023094 | cyc                  | FBgn0023076 | Clk              | 2 | 19376119<br>9616122                          | No  | Yes |

|             |        |             |         |   |                                              |     |     |
|-------------|--------|-------------|---------|---|----------------------------------------------|-----|-----|
| FBgn0085432 | pan    | FBgn0001139 | gro     | 2 | 9751710<br>17113388                          | No  | Yes |
| FBgn0004666 | sim    | FBgn0264075 | tgo     | 3 | 22036573<br>9403694<br>9409674               | Yes | Yes |
| FBgn0000588 | esc    | FBgn0020887 | Su(z)12 | 4 | 12408864<br>15896722<br>16537908<br>12697833 | No  | Yes |
| FBgn0000546 | EcR    | FBgn0003964 | usp     | 3 | 12556479<br>7644522<br>14592980 0            | No  | Yes |
| FBgn0034534 | maf-S  | FBgn0262975 | cnc     | 2 | 23661758<br>14605208                         | No  | Yes |
| FBgn0000964 | tj     | FBgn0000964 | tj      | 2 | 14605208<br>23661758                         | No  | Yes |
| FBgn0003300 | run    | FBgn0013753 | Bgb     | 2 | 8622696<br>14605208 0                        | No  | Yes |
| FBgn0003870 | ttk    | FBgn0262519 | Mi-2    | 2 | 22036573<br>20733004 0                       | No  | Yes |
| FBgn0020496 | CtBP   | FBgn0001169 | H       | 2 | 12154126<br>14605208                         | No  | Yes |
| FBgn0000611 | exd    | FBgn0003339 | Scr     | 2 | 17981120<br>22745600                         | No  | Yes |
| FBgn0015799 | Rbf    | FBgn0033846 | mip120  | 2 | 15479636<br>15545624                         | No  | Yes |
| FBgn0035357 | CG1244 | FBgn0262519 | Mi-2    | 2 | 19165147<br>20733004                         | No  | Yes |
